# Supplementary material
Source: MDPI journal article supplement (https://www.mdpi.com/1999-4907/10/10/930)
Supplement: s1 [file s1]

## Supplementary Materials

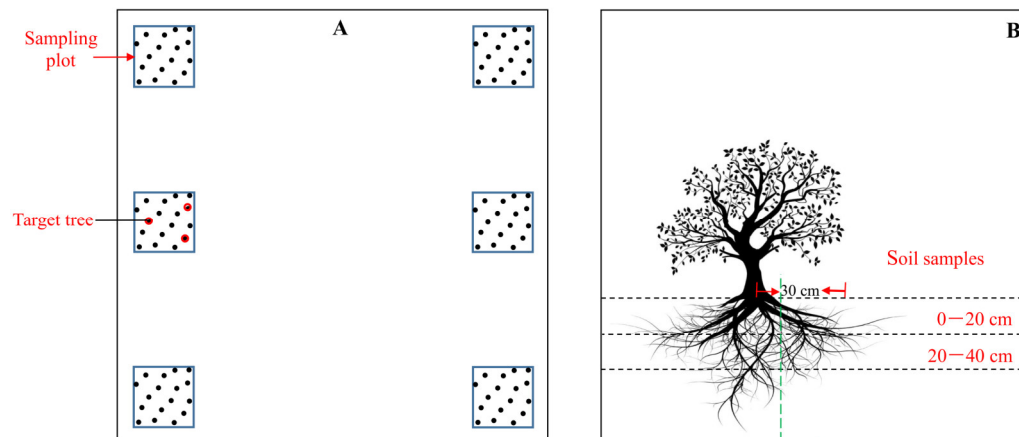

**Figure S1.** Plot design (A) and soil sampling (B). Soil samples were collected from the rhizosphere of five dominant tree species at two depths. Six sampling plots (20 m × 20 m, spaced 30–300 m) were selected, in which five trees of each target species (*H. rhamnoides*, *J. communis*, *P. cathayana*, *R. pseudoacacia* and *S. matsudana*) were distributed randomly. For each species, three healthy mature trees were selected randomly within each plot. Topsoil (0–20 cm) and subsoil (20–40 cm) samples were collected from the rhizosphere of each tree at two depths.
